# Supplementary material for: Explaining Support Vector Machines: A Color Based Nomogram
Source: PubMed Central journal article supplement (PMC5056733; doi:10.1371/journal.pone.0164568), 2016-10-10
Supplement: pone.0164568.s003.pdf [file pone.0164568.s003.pdf]

## Definition of the different contributions in the approximation of the SVM classifiers.

This appendix summarizes how the contributions  $f^{(p)}$  and  $f^{(p,q)}$  to the latent variable can be calculated for the linear, polynomial and RBF kernel.

### 1 Linear kernel

For the linear kernel, contributions involving more than two inputs do not exist, so  $f^{(p,q)}$  should not be defined. Contributions involving only one input are defined in the main paper as:

$$f^{(p)} = \sum_{i=1}^N \alpha_i y_i x_i^{(p)} x^{(p)}.$$

### 2 Polynomial kernel

The expansion of the polynomial kernel with  $a = 1$  equals:

$$\begin{aligned} K_{\text{poly}}(x_i, x) &= (x_i^T x + c)^\delta = \left( \sum_{p=1}^d x_i^{(p)} x^{(p)} + c \right)^\delta \\ &= c^\delta + \sum_{p=1}^d x_i^{(p)\delta} x^{(p)\delta} + \\ &\quad \sum_{p=1}^d \sum_{\substack{k_p + k_c = \delta \\ k_p, k_c \neq \delta}} \binom{\delta}{k_p, k_c} x_i^{(p)k_p} x^{(p)k_p} c^{k_c} + \\ &\quad \sum_{p=1}^d \sum_{q \neq p} \sum_{\substack{k_p + k_q = \delta \\ k_p, k_q \neq \delta}} \binom{\delta}{k_p, k_q} x_i^{(p)k_p} x^{(p)k_p} x_i^{(q)k_q} x^{(q)k_q} + \\ &\quad \sum_{p=1}^d \sum_{q \neq p} \sum_{\substack{k_p + k_q + k_c = \delta \\ k_p, k_q, k_c \neq \delta \\ k_p + k_q \neq \delta \\ k_p + k_c \neq \delta \\ k_q + k_c \neq \delta}} \binom{\delta}{k_p, k_q, k_c} x_i^{(p)k_p} x^{(p)k_p} x_i^{(q)k_q} x^{(q)k_q} c^{k_c} + \Delta \\ &= \sum_{p=1}^d g^{(p)}(x_i^{(p)}, x^{(p)}) + \sum_{p=1}^d \sum_{q \neq p} g^{(p,q)}(x_i^{(p,q)}, x^{(p,q)}) + b' + \Delta. \end{aligned}$$

The kernel is hereby decomposed in terms  $g^{(p)}$  that solely depend on the  $p^{\text{th}}$  input variable:

$$\begin{aligned}
g^{(p)}(x_i^{(p)}, x^{(p)}) &= \left(x_i^{(p)} x^{(p)}\right)^\delta + \sum_{\substack{k_p + k_c = \delta \\ k_p, k_c \neq \delta}} \binom{\delta}{k_p, k_c} x_i^{(p)k_p} x^{(p)k_c} c^{k_c} \\
&= K_{\text{poly}}(x_i^{(p)}, x^{(p)}) - c^\delta,
\end{aligned}$$

and terms that depend on two input variables  $x^{(p)}$  and  $x^{(q)}$ :

$$\begin{aligned}
g^{(p,q)}(x_i^{(p,q)}, x^{(p,q)}) &= \sum_{\substack{k_p + k_q = \delta \\ k_p, k_q \neq \delta}} \binom{\delta}{k_p, k_q} \left(x_i^{(p)} x^{(p)}\right)^{k_p} \left(x_i^{(q)} x^{(q)}\right)^{k_q} + \\
&\quad \sum_{\substack{k_p + k_q + k_c = \delta \\ k_p, k_q, k_c \neq \delta \\ k_p + k_q \neq \delta \\ k_p + k_c \neq \delta \\ k_q + k_c \neq \delta}} \binom{\delta}{k_p, k_q, k_c} x_i^{(p)k_p} x^{(p)k_p} x_i^{(q)k_q} x^{(q)k_q} c^{k_c} \\
&= K_{\text{poly}}(x_i^{(p,q)}, x^{(p,q)}) - g^{(p)}(x_i^{(p)}, x^{(p)}) - g^{(q)}(x_i^{(q)}, x^{(q)}) - c^\delta.
\end{aligned}$$

The latent variable of the SVM model using this kernel can then be decomposed in terms  $f^{(p)}$  depending on the  $p^{\text{th}}$  input variable:

$$f^{(p)}(x_i^{(p)}, x^{(p)}) = \sum_{i=1}^N \alpha_i y_i g^{(p)}(x_i^{(p)}, x^{(p)})$$

and terms depending on two input input variables:

$$f^{(p,q)}(x_i^{(p,q)}, x^{(p,q)}) = \sum_{i=1}^N \alpha_i y_i g^{(p,q)}(x_i^{(p,q)}, x^{(p,q)}).$$

### 3 RBF kernel

The RBF kernel can be expanded as:

$$\begin{aligned}
K_{\text{RBF}}(x_i, x) &= \sum_{n=0}^{\infty} \frac{(-1)^n \gamma^n}{n!} \left[ \sum_{p=1}^d (x_i^{(p)} - x^{(p)})^{2n} + \right. \\
&\quad \left. \sum_{p=1}^d \sum_{q \neq p} \sum_{\substack{k_p + k_q = n \\ k_p, k_q \neq n}} \binom{n}{k_p, k_q} (x_i^{(p)} - x^{(p)})^{2k_p} (x_i^{(q)} - x^{(q)})^{2k_q} \right] \\
&\quad + \Delta, \\
&= \sum_{p=1}^d g^{(p)}(x_i^{(p)}, x^{(p)}) + \sum_{p=1}^d \sum_{q \neq p} g^{(p,q)}(x_i^{(p,q)}, x^{(p,q)}) + \Delta.
\end{aligned}$$

The kernel is hereby decomposed in terms  $g^{(p)}$  that solely depend on the  $p^{\text{th}}$  input variable:

$$\begin{aligned}
g^{(p)}(x_i^{(p)}, x^{(p)}) &= \sum_{n=0}^{\infty} \frac{(-1)^n \gamma^n}{n!} \sum_{p=1}^d (x_i^{(p)} - x^{(p)})^{2n} \\
&= K_{\text{RBF}}(x_i^{(p)}, x^{(p)}),
\end{aligned}$$

and terms that depend on two input variables  $x^{(p)}$  and  $x^{(q)}$ :

$$\begin{aligned}
g^{(p,q)}(x_i^{(p,q)}, x^{(p,q)}) &= \sum_{n=0}^{\infty} \frac{(-1)^n \gamma^n}{n!} \sum_{\substack{k_p + k_q = n \\ k_p, k_q \neq n}} \binom{n}{k_p, k_q} (x_i^{(p)} - x^{(p)})^{2k_p} (x_i^{(q)} - x^{(q)})^{2k_q} \\
&= K_{\text{RBF}}(x_i^{(p,q)}, x^{(p,q)}) - K_{\text{RBF}}(x_i^{(p)}, x^{(p)}) - K_{\text{RBF}}(x_i^{(q)}, x^{(q)}).
\end{aligned}$$

The latent variable of the SVM model using this kernel can then be decomposed in terms  $f^{(p)}$  depending on the  $p^{\text{th}}$  input variable:

$$f^{(p)}(x_i^{(p)}, x^{(p)}) = \sum_{i=1}^N \alpha_i y_i g^{(p)}(x_i^{(p)}, x^{(p)})$$

and term depending on two input input variables:

$$f^{(p,q)}(x_i^{(p,q)}, x^{(p,q)}) = \sum_{i=1}^N \alpha_i y_i g^{(p,q)}(x_i^{(p,q)}, x^{(p,q)}).$$
