# Supplementary material for: Explaining Support Vector Machines: A Color Based Nomogram
Source: PubMed Central journal article supplement (PMC5056733; doi:10.1371/journal.pone.0164568), 2016-10-10
Supplement: pone.0164568.s004.pdf [file pone.0164568.s004.pdf]

## Setting of artificial examples.

Figure 1 illustrates the problem settings of the artificial experiments performed in the main manuscript.

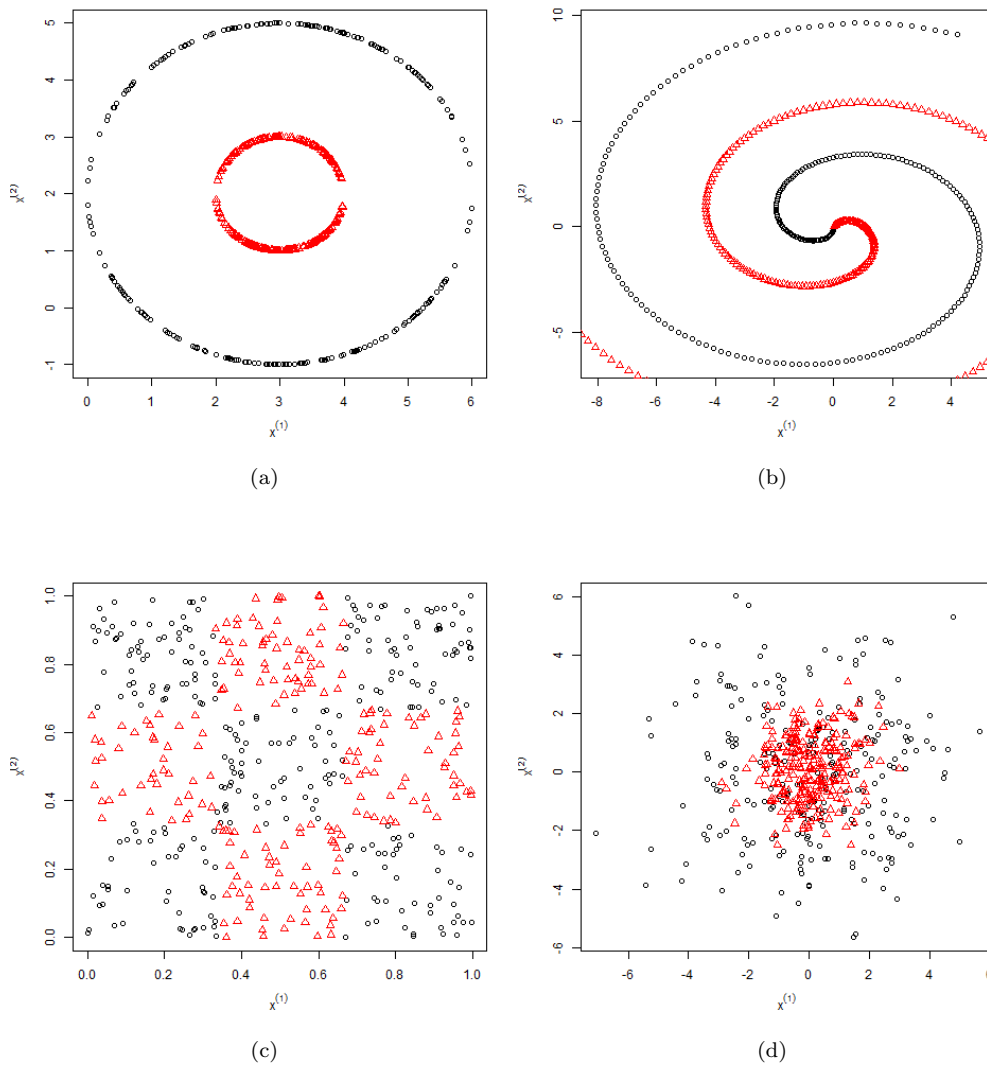

Figure 1: Visualization of the artificial datasets in a two-dimensional space, spanned by the two relevant input variables  $x^{(1)}$  and  $x^{(2)}$ . Observations of the first class are indicated by black circles, observations of the second class by red triangles. (a) two-circles, (b) swiss roll, (c) xor, (d) two Gaussians.
