# Supplementary material for: Explaining Support Vector Machines: A Color Based Nomogram
Source: PubMed Central journal article supplement (PMC5056733; doi:10.1371/journal.pone.0164568), 2016-10-10
Supplement: pone.0164568.s005.pdf [file pone.0164568.s005.pdf]

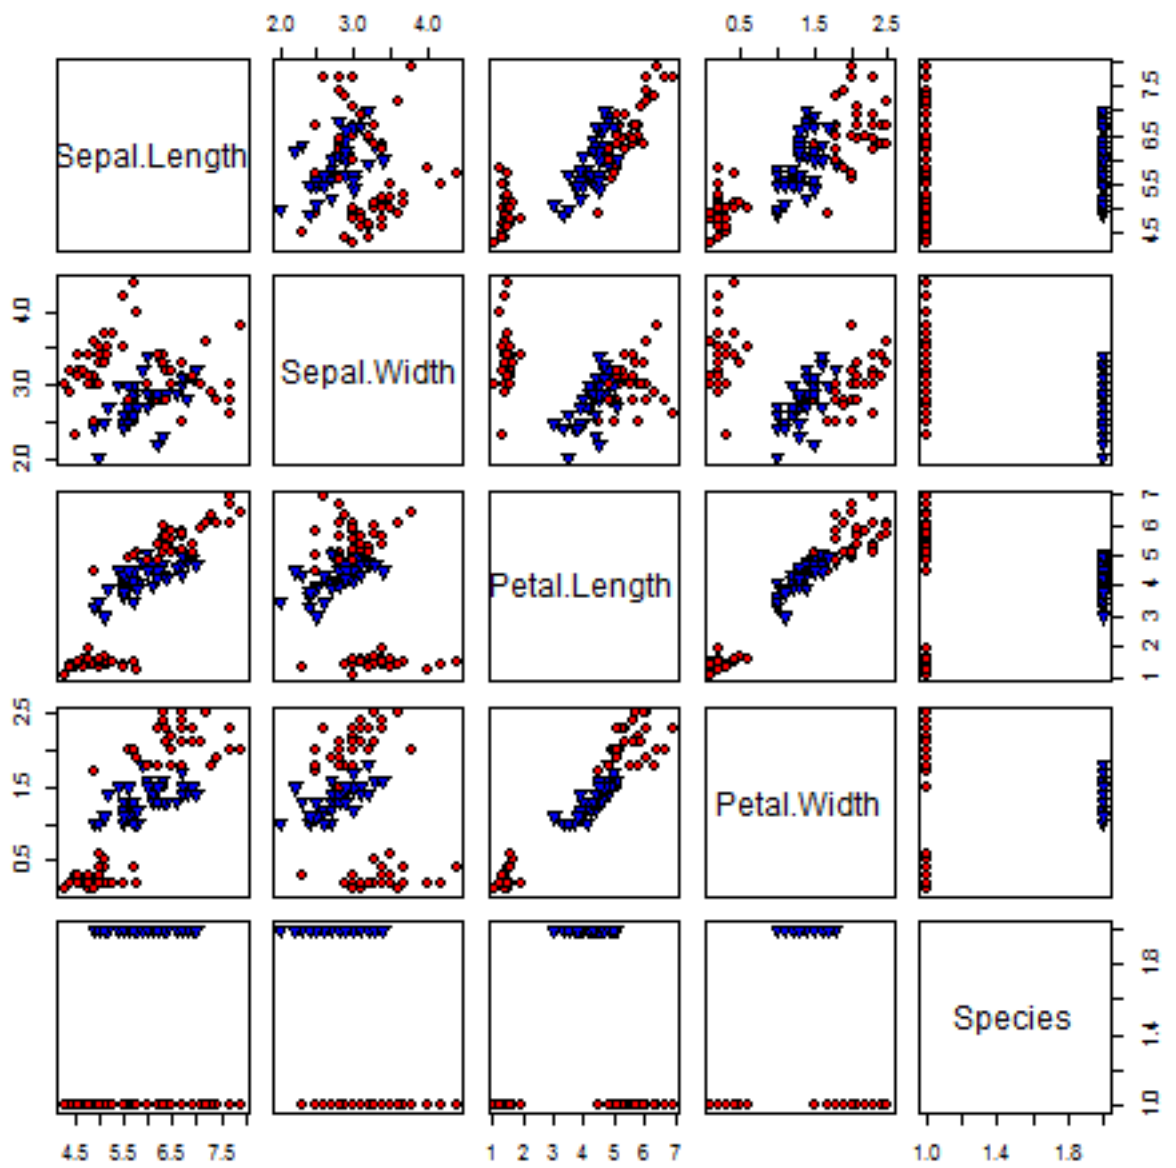

Figure 1: Bivariate plot of the Iris data (training data).
